# Supplementary material for: Low Plasma Lipids are Associated with Relapsing and Lethal Visceral Leishmaniasis in HIV-Infected Patients
Source: Preprints.org preprint supplement (doi:10.20944/preprints202404.1987.v1), 2024-04-30
Supplement: Supplementary file 1 [file supplementary]

**Supplemental table 1**. Comparison of the lipid profile of 29 individuals in the first episode and with relapsing evolution visceral leishmaniasis infected with HIV with the desirable values.

| Lipid profile | First episode  Mean (95% CIa) | Relapsing  Median (IQb) | Desirable values (mg/dL) |
| --- | --- | --- | --- |
| Total cholesterol (mg/dL) | 93.2 (49.7; 136.6) | 68.5 (51.6; 69.4) | < 190 mg/dL |
| LDLc (mg/dL) | 28.1 (7.6; 48.6) | 15.5 (9.8; 21.2) | < 130 mg/dL |
| HDLd (mg/dL) | 44.7 (20.4; 69.0) | 30.4 (23.8; 37.0) | > 40 mg/dL |
| VLDLe (mg/dL) | 20.4 (14.5; 26.3) | 14.6 (12.0; 17.3) | < 45 mg/dL |
| Triglycerides (mg/dL) | 102.0 (72.4; 131.6) | 73.2 (59.9; 86.6) | < 175 mg/dL |

a 95% confidence interval. b Interquartile range. c Low-density lipoprotein. d High-density lipoprotein. e Very low-density lipoprotein.
